# Supplementary material for: A novel WH-flags method based on reducing the acidity of molybdenum blue (MB) reaction and stabilization by EDTA for quickly detecting phosphorus in water
Source: Royal Society of Chemistry journal article supplement (doi:10.1039/d1em00096a), 2021-01-01
Supplement: d1em00096a1.pdf [file d1em00096a1.pdf]

## Supplementary material

# **A novel WH-flags method based on reducing the acidity of molybdenum blue (MB) reaction and stabilization by EDTA for quickly detecting phosphorus in water**

Yanghui Xiong<sup>1</sup>, Yuan-Bo Wang<sup>1,3</sup>, De-Sheng Pei<sup>1,2,4\*</sup>

<sup>1</sup>Key Laboratory of Reservoir Aquatic Environment, Chongqing Institute of Green and Intelligent Technology, Chinese Academy of Sciences, Chongqing 400714, China.

<sup>2</sup>College of Life Science, Henan Normal University, Xinxiang 453007, Henan, China.

<sup>3</sup>College of Architecture and Urban Planning, Chongqing Jiaotong University, Chongqing 400074, China

<sup>4</sup>University of Chinese Academy of Sciences, Beijing 100049, China.

\*Corresponding author.

E-mail: [peids@cigit.ac.cn](mailto:peids@cigit.ac.cn) or [deshengpei@gmail.com](mailto:deshengpei@gmail.com) (D.S.P)

**Table S1. Increasing rates from the initiation of stabilization to the ending (in the 40 min course)**

|                   | <b>0.1</b>    | <b>0.2</b>    | <b>0.8</b>    | <b>1.4</b>    | <b>1.6</b>    | <b>1.8</b>    |
|-------------------|---------------|---------------|---------------|---------------|---------------|---------------|
|                   | <b>mg/L P</b> |
| <b>Reactive P</b> | 4.00–         |               | 1.53–         | 0.90–         |               |               |
|                   | 4.08 %        |               | 1.55 %        | 1.34 %        |               |               |
| <b>Total P</b>    | 5.26–         | 2.63–         | 1.69–         |               | -4.07–        | -3.65 – -     |
|                   | 7.69 %        | 3.85 %        | 2.01 %        |               | 0.34 %        | 0.30 %        |

**Table S2. The linearity, linear ranges, and equations of reactive P and total P**

|                   | <b>Linear range (mg/L)</b> | <b>Equation</b> | <b>R<sup>2</sup></b> |
|-------------------|----------------------------|-----------------|----------------------|
| <b>Reactive P</b> | 0-1.4                      | $Y=0.479 * X$   | 0.9997               |
| <b>Total P</b>    | 0-1.8                      | $Y=0.367 * X$   | 0.9999               |

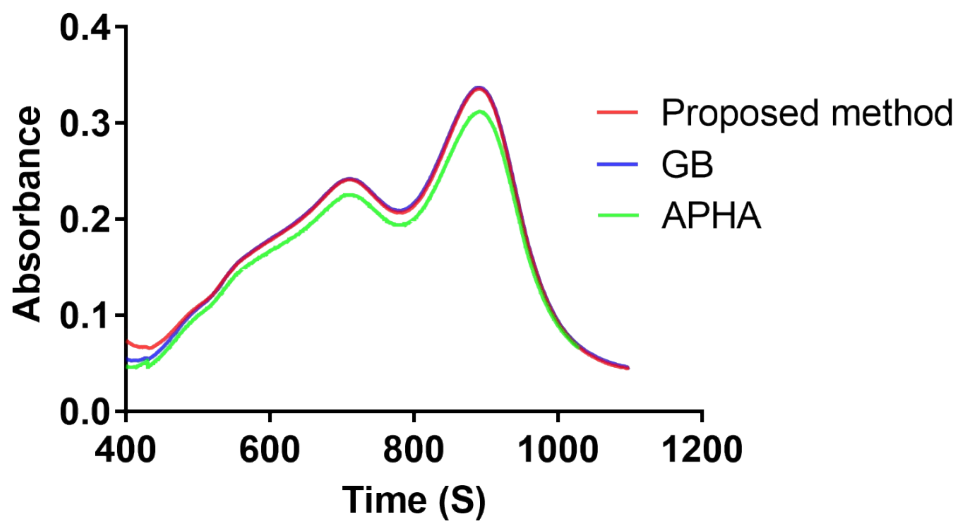

Fig. S1. The spectrum for 0.5 mg/L reactive P by three methods
